# Supplementary material
Source: publisher site journal article supplement (https://www.spandidos-publications.com/3831/downloadSupplementary)

Figure S1. Effect of circPhc3 on MMP-13 and ADAMTS5 expression levels in chondrocytes. Protein expression levels were (A) determined by western blotting and semi-quantified for (B) MMP-13 and (C) ADAMTS5 in chondrocytes transfected with shRNA-NC, shRNA-circPhc3, Mock or circPhc3 overexpression vector (n=4). circ, circular RNA; MMP, matrix metalloproteinase; ADAMTS5, a disintegrin and metalloprotease with thrombospondin type 1 motif 5; shRNA, short hairpin RNA; NC, negative control.

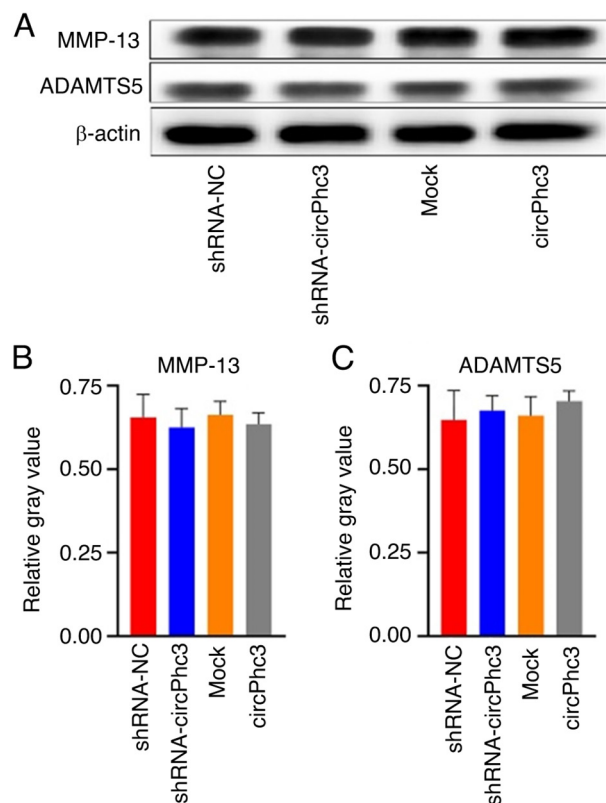

Supplement: Supplementary file 1 [file downloadSupplementary]
